# Supplementary material for: Impact of COVID-19 lockdowns on hospital presentations and admissions in the context of low community transmission: evidence from time series analysis in Melbourne, Australia
Source: HighWire-hosted journal article supplement (doi:10.1136/jech-2021-217010), 2021-11-15
Supplement: jech-2021-217010supp001_data_supplement.pdf [file jech-2021-217010supp001_data_supplement.pdf]

**Supplemental Figure S1: Model performance pre-COVID.** Vertical lines demarcate five independently estimated 26 week periods, based on preceding data. The last 26 week period represents the study period explored in the main text. Forecasts do capture the patterns of the observed series, very rarely are actual observations outside prediction intervals. There is a clear difference between the relationship between forecasts and actual observations for the four 26-week periods pre-COVID and the 26 week period following the onset of the pandemic.

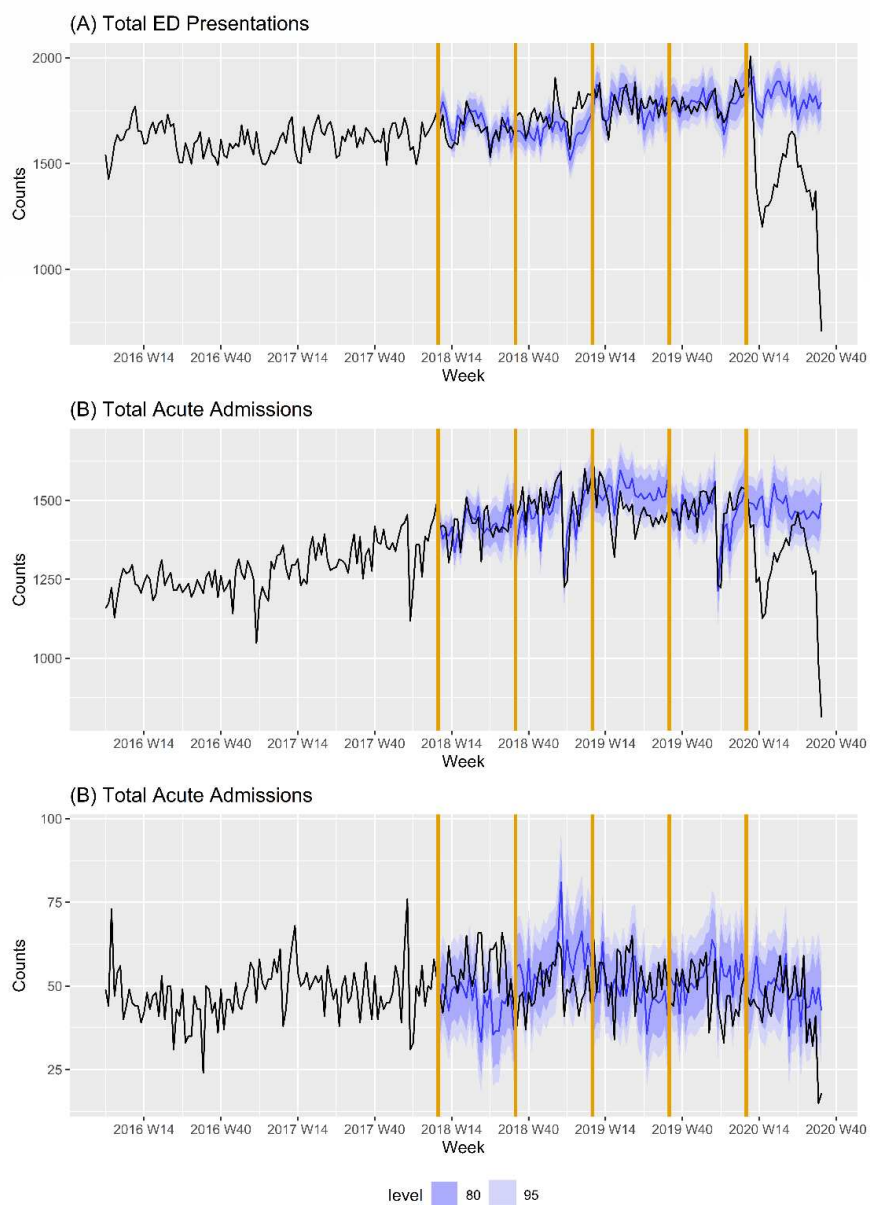

**Supplemental Figure S2: Injury Presentations to ED by Age.** Injury was defined as any presentation which included non-null 'injury cause', 'activity when injured' or 'location of injury' data in the Electronic Medical Record.

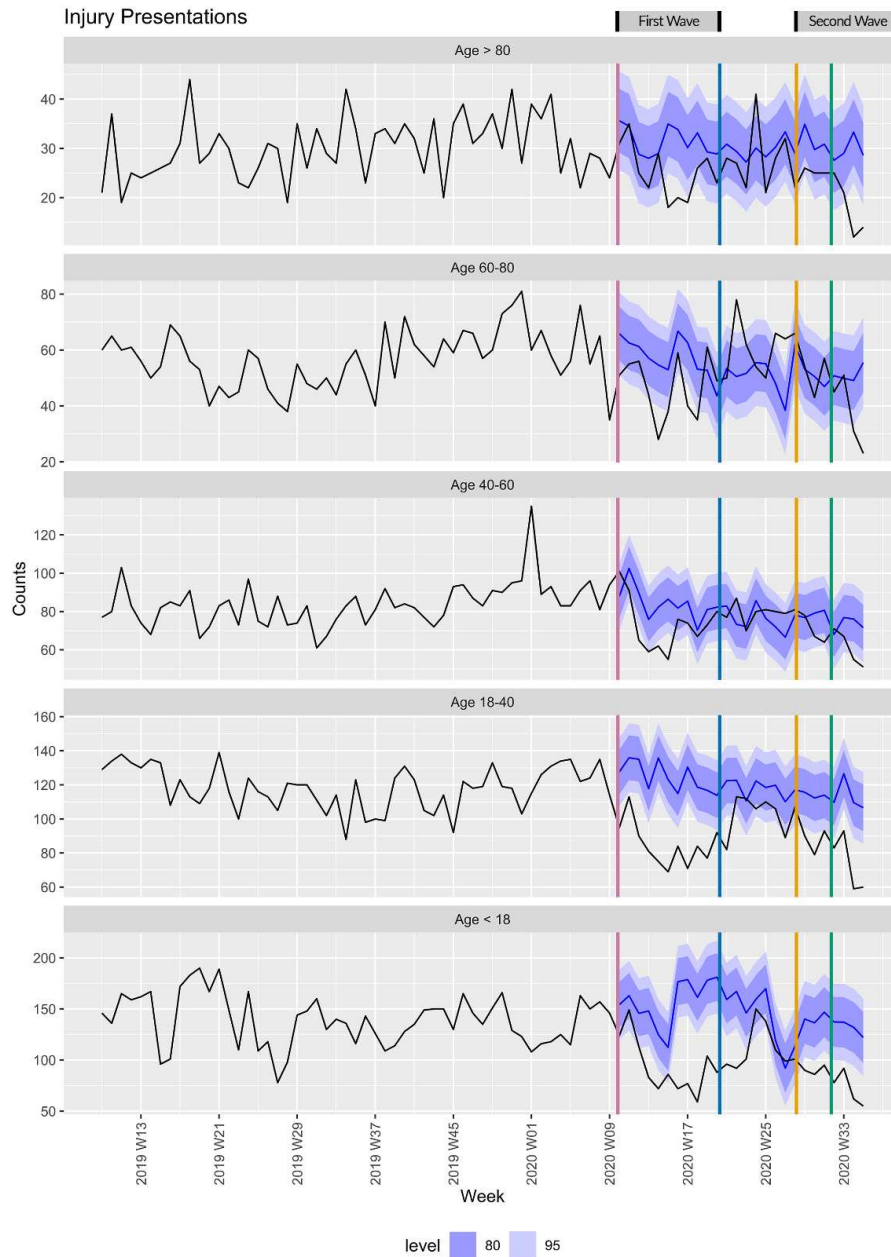

**Supplemental Table 1 – Patient characteristics by presentation frequency, ED and Admitted Patients: Sep-March 2019, Sep-March 2020**

| N, (% of row) unless otherwise specified |     | March-Sept 2019 |              |             |             |                     |                     |                     | March-September 2020 |             |                        |                       |                       |                     |                     |
|------------------------------------------|-----|-----------------|--------------|-------------|-------------|---------------------|---------------------|---------------------|----------------------|-------------|------------------------|-----------------------|-----------------------|---------------------|---------------------|
|                                          |     | Mean Age (SD)   | Male         | Charlson 3+ | Frailty 15+ | IRSAD Quintiles 1-2 | IRSAD Quintiles 4-5 | Married / Partnered | Median Age (IQR)     | Male        | Charlson >=3           | Frailty 15+           | IRSAD Quintiles 1-2   | IRSAD Quintiles 4-5 | Married / Partnered |
| Admissions prev. 12 Months               | 0-2 | 48.7 (26)       | 14,084 (57%) | 2,020 (8%)  | 852 (3%)    | 3,986 (16%)         | 8,921 (36%)         | 11,594 (47%)        | 46.9 (26)            | 9,575 (57%) | 412 (7%)               | 179 (3%)              | 2,713 (16%)           | 6,130 (36%)         | 7,944 (47%)         |
|                                          | 3+  | 63.2 (20)       | 1,010 (52%)  | 692 (36%)   | 597 (31%)   | 422 (22%)           | 607 (32%)           | 840 (44%)           | 66.4 (20)            | 38 (40%)    | 24 (25%) <sup>++</sup> | 16 (17%) <sup>#</sup> | 34 (36%) <sup>^</sup> | 26 (27%)            | 43 (45%)            |
| ED prev. 12 months                       | 0-2 | 49.3 (26)       | 14,061 (57%) | 2,169 (9%)  | 903 (4%)    | 3,963 (16%)         | 8,995 (37%)         | 11,735 (48%)        | 47.0 (26)            | 9,471 (57%) | 406 (7%)               | 172 (3%)              | 2,669 (16%)           | 6,087 (36%)         | 7,897 (47%)         |
|                                          | 3+  | 55.8 (26)       | 1,033 (55%)  | 543 (29%)   | 546 (29%)   | 445 (24%)           | 533 (28%)           | 699 (37%)           | 48.5 (25)            | 142 (51%)   | 30 (13%)               | 23 (10%)              | 78 (18%)              | 69 (25%)            | 90 (33%)            |

<sup>^</sup>Chi2 test for independence across time periods for frequent presenters:  $\text{Chi}^2=9.8604$ ,  $P = 0.002$

<sup>#</sup> Chi2 test for independence across time periods for frequent presenters:  $\text{Chi}^2= 10.1320$   $Pr = 0.017$

<sup>++</sup> Chi2 test for independence across time periods for frequent presenters:  $\text{Chi}^2= 9.1121$   $Pr = 0.011$
